# Supplementary material for: Reduced costs of reproduction in females mediate a shift from a male-biased to a female-biased lifespan in humans
Source: PubMed Central journal article supplement (PMC4834564; doi:10.1038/srep24672), 2016-04-18

1 **Supplementary Methods, Tables and Figures for:**

2

3 **Reduced costs of reproduction in females mediate a shift from a male-biased to a**  
4 **female-biased lifespan in humans**

5

6 Elisabeth Bolund, Virpi Lummaa, Ken R. Smith, Heidi Hanson, Alexei A. Maklakov

7

8

9 **Supplementary Methods**

10

11 *Data*

12 The Utah Population Database (UPDB) is one of the most comprehensive computerised  
13 genealogies in the world. Genealogy records are gathered and provided by the Genealogical  
14 Society of Utah and span the pioneer settlement era in Utah in the mid-1800s as well as their  
15 Utah descendants until the present day<sup>1</sup>. These records include information on fertility and  
16 mortality for parents and their children. Before 1890 polygamy was practiced by a minority  
17 of the population<sup>2</sup>. Non-paternity rates in Utah are lower than the US average<sup>3</sup>. The Utah  
18 population during the period studied here suffered less mortality than most comparable  
19 populations, especially at early ages<sup>4</sup>.

20

21 For this study, we focussed on the time period surrounding the demographic transition and  
22 included individuals from the UPDB that were born between 1820 and 1920 (no individual  
23 born before 1920 was still alive at the end of data coverage for this study in 2012). We  
24 required full information for a number of variables that were entered as fixed and random  
25 effects in the models, namely reproductive history, whether the individual was involved in a

26 polygamous marriage (4.7% of females and 1.9% of males), whether the individual was born  
27 in Utah (54% of females and 52% of males), birth order in three levels denoting whether an  
28 individual was the firstborn son, the firstborn daughter, or laterborn of either sex (to control  
29 for effects of inherited wealth), and the identity of the birth mother (maternal identity, to  
30 account for non-independence of individuals born in the same family). All individuals with  
31 full information for these fixed and random effects also had known birth and death dates,  
32 hence censoring was not employed in survival models. Individuals were divided into four  
33 birth cohorts of 25 years each, commencing 1820. This resulted in a total sample size of  
34 75,667 reproducing females and 64,933 reproducing males.

35

36 Because the dataset is built from descendant genealogies, it likely underrepresents individuals  
37 that are known to not reproduce. In the present study, 1.7% of married individuals were  
38 known to be nulliparous, likely representing a non-random subset of the population because  
39 involuntary childlessness may be more common in frail individuals. Because of the difficulty  
40 to achieve a representative subset of nulliparous individuals and our interest in the cost of  
41 increased parity and the effect of changes in parity on lifespan, we therefore focussed on only  
42 reproducing individuals in the main analyses. For comparison, we include Kaplan-Meier  
43 survivor curves for presumably nulliparous individuals of the two sexes over the studied time  
44 period in Supplementary Fig. 1. These should be interpreted with knowledge of the lowered  
45 accuracy of the data in these individuals, because individuals that were registered as non-  
46 reproducers may be so because of a lack of information regarding their reproduction.

47

#### 48 *Sexual dimorphism in lifespan*

49 To look at the differences in survival patterns between the two sexes and how this changed  
50 over time, we used the *survival* package in R<sup>5</sup> to plot Kaplan-Meier survival curves for the two

51 sexes in four cohorts of 25 years each, starting at the year 1820. Because the interest was in  
52 adult survival and we focussed on only reproducing individuals, individuals that died before  
53 reproductive age are not included in the survival analyses. Hence, the first deaths occur at age  
54 15. We tested if the sexes differed significantly with log rank and Wilcoxon tests in each  
55 cohort (Figure 1). We then proceeded with parametric accelerated failure time (AFT) survival  
56 models using the *survreg* function in the survival package. AFT models assume that the  
57 effects of covariates are multiplicative with respect to survival time. Parametric models  
58 require that a distribution is specified for the survival times. We compared the fit of  
59 exponential, Weibull, log-normal and log-logistic models using two approaches: graphically,  
60 by comparing the predicted estimates from the fitted model with the observed Kaplan-Meier  
61 estimate of the survivor function, and analytically, by comparing model fits with different  
62 distributions specified, using  $\chi^2$ -tests for nested models (exponential, Weibull and log-  
63 logistic) and using Akaike's information criterion (AIC) for non-nested models. This showed  
64 that a Weibull distribution provided the best fit. The Gompertz model was not intended to  
65 study mortality patterns beyond the age of about 80 years and thus was not considered<sup>6</sup>.  
66 Models included as fixed effects polygamy status, birth in or outside of Utah, birth order and  
67 birth cohort. Sex was added as a stratified fixed effect to allow different baseline survival  
68 shapes for the two sexes. Observations were clustered by maternal identity to account for  
69 clustering within mothers. The interaction between sex and birth cohort indicates whether the  
70 two sexes differ in each cohort. To ensure that these results are not dependant on the arbitrary  
71 division of the data into 25 year birth cohorts, we repeated the analyses, first with the data  
72 divided into 5 cohorts of 20 years each, and second, with birth year treated as a continuous  
73 variable. Results were robust to these alternative model specifications (not shown). Mortality  
74 during migration to Utah is likely to have had sex-specific effects on survival. The analyses  
75 detailed above includes all individuals with known birth and death information, regardless of

76 whether they were born or died in Utah or elsewhere. Because all individuals in the first  
77 cohort were born outside Utah, most of these individuals suffered the hardships of migration,  
78 affecting the sexes differently and resulting in an overall more robust cohort surviving to old  
79 ages. Subsequent cohorts are composed of four categories: individuals that 1) were born  
80 elsewhere and migrated to Utah, 2) were born and died in Utah, 3) were born in Utah and  
81 died elsewhere and, 4) were born and died outside of Utah. Cohort 2 thus offers the  
82 opportunity to compare migrants into Utah with individuals that spent their entire lives in  
83 Utah during a time period when migration still imposed hardships (Supplementary Fig. 1a).  
84 To test for a healthy migrant effect, we used a parametric survival model that adjusted for  
85 polygamy status and birth order as fixed effects, and clustered the observations by maternal  
86 identity. Because the conditions during migration changed over time, we validated the use of  
87 cohort 2 for this comparison by comparing migrants in cohort 2 with migrants in cohort 1  
88 (Supplementary Fig. 1b) and looked at the difference in survival between migrants in these  
89 two cohorts in a parametric survival model within each sex, with covariates as described  
90 above.

91

### 92 *Reproduction-lifespan trade-off*

93 To test for a trade-off between reproduction and lifespan in the two sexes, we investigated the  
94 relationship between number of children born and post-reproductive lifespan with two  
95 approaches. First, we employed the R-package *MCMCglmm*, which uses an iterative  
96 Bayesian approach<sup>7</sup> and provides meaningful error estimates for derived variables by direct  
97 sampling from the posterior distribution. Individuals were required to live until age 55 or  
98 older, in order to focus on the effect of reproduction on late life mortality (100% of all  
99 women and 96.8% of all men had finished reproduction by this age). This avoids  
100 confounding deaths caused by childbearing (Figure 1) with post-reproductive mortality.

101 Hence, we subtracted 55 years from the total lifespan to obtain the response variable post-  
102 reproductive lifespan. Our selection criteria restricted the total sample size to 118,911  
103 individuals. Models controlled for a number of fixed effects as described above (polygamy  
104 status, whether the individual was born in Utah, birth order and birth cohort). Maternal  
105 identity was included as a random effect to account for non-independence of observations  
106 within families. Number of children born was standardised within sexes prior to the analysis  
107 (mean of zero; SD of one) and we used post-reproductive lifespan as a Gaussian response  
108 variable. The initial model included the interaction between sex and both the linear and the  
109 quadratic (non-linear) term for number of children born. The 95% Bayesian credibility  
110 intervals for the interaction term indicate whether the linear or quadratic slope of the  
111 relationship between number of children and post-reproductive lifespan differed significantly  
112 between the two sexes. The quadratic term was not significant and subsequently excluded  
113 from the model. Because the maximum number of children was 64 in males and 21 in  
114 females, we investigated whether males with extreme values influenced the result by  
115 removing the 282 males with 22 or more children, generally polygamist men. After this  
116 equalisation of potential reproductive effort in the two sexes, we re-estimated the above  
117 model. This did not influence the results so we present results from the full dataset. To obtain  
118 sex-specific estimates for the relationship between reproductive effort and lifespan, we re-  
119 estimated the model for each sex separately. In the sex-specific models, the quadratic effect  
120 was significant in both sexes and was thus retained in both models. Because males that  
121 continued to reproduce after age 55 might inflate the estimates, the male-specific model was  
122 re-estimated excluding the 3.2% of males that continued to reproduce after age 55. This did  
123 not influence the results so we present results from the full dataset. All models were run with  
124 a prior with  $V = 1$  and a degree of belief parameter ( $\nu$ ) of 0.002. Convergence of runs was  
125 assessed by visual inspection of output plots.

126

127 Alternatively, post-reproductive lifespan can be analysed in a survival model framework. To  
128 increase comparability with the models on sexual dimorphism in lifespan, and to obtain sex-  
129 specific estimates of acceleration factors for individuals with different levels of reproductive  
130 output, we used parametric survival models using the function *survreg* in the R-package  
131 survival. The subset used for analyses was restricted to individuals that survived until age 55  
132 and their lifespan was used as the response variable. A Weibull distribution provided the best  
133 fit to the data in both sexes. Models included fixed effects as above, observations were  
134 clustered by maternal identity and birth cohort was added as a stratified fixed effect to allow  
135 different baseline survival shapes for each birth cohort. To obtain acceleration factors for  
136 different levels of reproductive output, we grouped the number of children born into six  
137 different levels representing low to high reproductive investment: one child, two to four  
138 children, five to eight children, nine to 14 children, 15 to 21 children and 22 to 64 children  
139 (males only).

140

141 Infant mortality may influence reproductive decisions and thus affect costs of reproduction,  
142 potentially in a sex-specific manner. The main cause of infant mortality in historical Utah  
143 was infectious diseases<sup>4</sup> and it is thus possible that infant mortality could affect the health and  
144 survival of mothers and fathers differently. While infant mortality in historical Utah was  
145 comparatively low, in the current study, 33% of reproducing women with full known  
146 reproductive history from birth cohorts 1 and 2 (that reproduced when fertility rates were  
147 high, Figure 1) lost one or more infants during the first year of life, while this dropped to 23%  
148 for women from cohorts 3 and 4 (that reproduced when fertility rates were lower). To account  
149 for the effects of infant mortality, we repeated the analyses of costs of reproduction with  
150 infant loss included as a two-level covariate (the individual had one or more children that

151 died during the first year of life versus all children survived their first year of life). This did  
152 not influence the results (not shown) and we thus present models excluding this variable,  
153 because the predictions regarding how infant mortality is expected to influence total fertility  
154 and sex-specific survival patterns are not straightforward.

155

## 156 **References**

157

158 1 Albright, L. A. C. Utah family-based analysis: Past, present and future. *Hum Hered*  
159 65, 209-220, doi:10.1159/000112368 (2008).

160 2 Bean, L. L. & Mineau, G. P. The polygyny-fertility hypothesis - a re-evaluation. *Pop*  
161 *Stud-J Demog* 40, 67-81, doi:10.1080/0032472031000141846 (1986).

162 3 Bean LL, Mineau GP & DL, A. Fertility change on the American frontier: Adaptation  
163 and innovation. (University of California Press, 1990).

164 4 Bean, L. L. et al. Infant deaths in Utah, 1850-1939. *Utah historical quarterly*. 70, 16  
165 (2002).

166 5 A package for survival analysis in S v. R package version 2.37-7 (2014).

167 6 Olshansky, S. J. & Carnes, B. A. Ever since Gompertz. *Demography* 34, 1-15,  
168 doi:10.2307/2061656 (1997).

169 7 Hadfield, J. MCMC methods for multi-response generalized linear mixed models: The  
170 MCMCglmm R package. *J Stat Software* 33, 1-22, doi:10.18637/jss.v033.i02 (2010).

171

172 **Supplementary tables and figures**

173

174 **Table S1.** Averages ( $\pm$  SD) and sample sizes of number of children and lifespan in the two  
175 sexes in four birth cohorts in historical Utah.

176

| Birth cohort | Average children $\pm$ SD |                | Average lifespan $\pm$ SD |                 | N       |       |
|--------------|---------------------------|----------------|---------------------------|-----------------|---------|-------|
|              | females                   | males          | females                   | males           | females | males |
| 1820 to 1844 | 8.5 $\pm$ 3.3             | 11.1 $\pm$ 5.7 | 68.3 $\pm$ 17.8           | 70.1 $\pm$ 14.3 | 3298    | 3793  |
| 1845 to 1869 | 7.8 $\pm$ 3.3             | 8.3 $\pm$ 3.8  | 69.5 $\pm$ 17.5           | 70.2 $\pm$ 14.6 | 17331   | 16403 |
| 1870 to 1894 | 5.8 $\pm$ 3.1             | 5.8 $\pm$ 3.0  | 72.4 $\pm$ 18.1           | 70.8 $\pm$ 15.6 | 37156   | 33919 |
| 1895 to 1919 | 4.2 $\pm$ 2.5             | 4.2 $\pm$ 2.4  | 76.7 $\pm$ 17.5           | 72.6 $\pm$ 15.7 | 17882   | 10818 |

177



178 **Table S2. Proportion of reproducing women who died the same year in which they gave**  
179 **birth to their last child,** in four birth cohorts in historical Utah. Sample sizes as reported in  
180 Table S1.

181

| Birth cohort        | 1820 to 1844 | 1845 to 1869 | 1870 to 1894 | 1895 to 1919 |
|---------------------|--------------|--------------|--------------|--------------|
| Proportion deceased | 0.0633       | 0.053        | 0.037        | 0.019        |

182

183

184 **Figure S1.**

185 Comparison of sex-specific survival patterns between (a) individuals that migrated into Utah  
186 and individuals that spent their entire lives in Utah in birth cohort (coh) 2 and (b) individuals  
187 that migrated into Utah in birth cohort 1 compared to migrants in birth cohort 2. Birth cohort  
188 2 is composed of four groups of individuals with respect to migratory status: individuals that  
189 were born and died in Utah, individuals that were born elsewhere and died in Utah,  
190 individuals that were born in Utah but died elsewhere and individuals that spent their entire  
191 lives outside Utah. In (a), the first two of these groups are compared, separately in the two  
192 sexes. The early migrants to Utah faced harsher conditions during migration than later  
193 migrants. Therefore, figure (b) compares the effects of migration on survival in the early  
194 migrants into Utah of cohort 1 with the later migrants of cohort 2, separately in the two sexes.  
195 Note that migrants into Utah in cohort 2 thus appear in both figures, males in light blue and  
196 females in orange. In (a), these migrants are compared to non-migrants within the same  
197 cohort (males in blue and females in red), whereas in (b), the migrants in cohort 2 are  
198 compared to migrants in cohort 1 (males in blue and females in red). Shown are the birth  
199 years (Yr) contained in birth cohort 1 (a) or 1 and 2 (b) and the sample size in each group  
200 (N). Dotted vertical lines indicate the average lifespan of (a) non-migrants (black) and  
201 migrants (grey) in both sexes pooled and of (b) migrants in cohort 1 (black) and cohort 2  
202 (grey). All p-values were  $> 0.2$  from GW and LR tests of the difference between individuals  
203 within each sex that were born in Utah and individuals that migrated into Utah (a), and  
204 likewise (b), all p-values comparing migrants in cohort 1 to migrants in cohort 2 were  $> 0.25$   
205 in females. Migrant males in cohort 1 tended to live longer than migrant males in cohort 2,  
206 GW  $\chi^2 = 9.3$ ,  $p = 0.002$ , LR  $\chi^2 = 3.7$ ,  $p = 0.053$ .

207

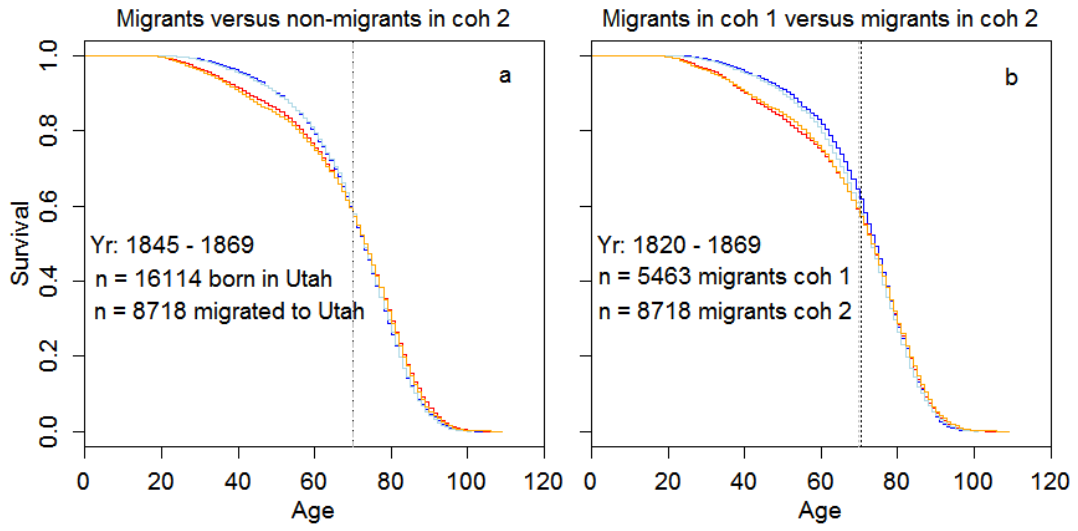

209 **Figure S2.**

210 Age-specific adult survival for females (red) and males (blue) that presumably did not  
211 reproduce, divided into four 25-year birth cohorts that cover the demographic transition in  
212 Utah. Shown in each figure are the birth years contained in that cohort (Yr), the sample size  
213 (n), the average  $\pm$  SD number of children born to females (CHf), the  $\chi^2$  and p-values  
214 indicating differences in the survivor function between the two sexes from the Peto and Peto  
215 modification of the Gehan-Wilcoxon test (GW, this test weights differences in survivorship  
216 that occur early more heavily than differences at later survival times) and from a log-rank test  
217 (LR, this test weights differences at later survival times more heavily). Dotted vertical lines  
218 indicate the average lifespan of each sex in each cohort.

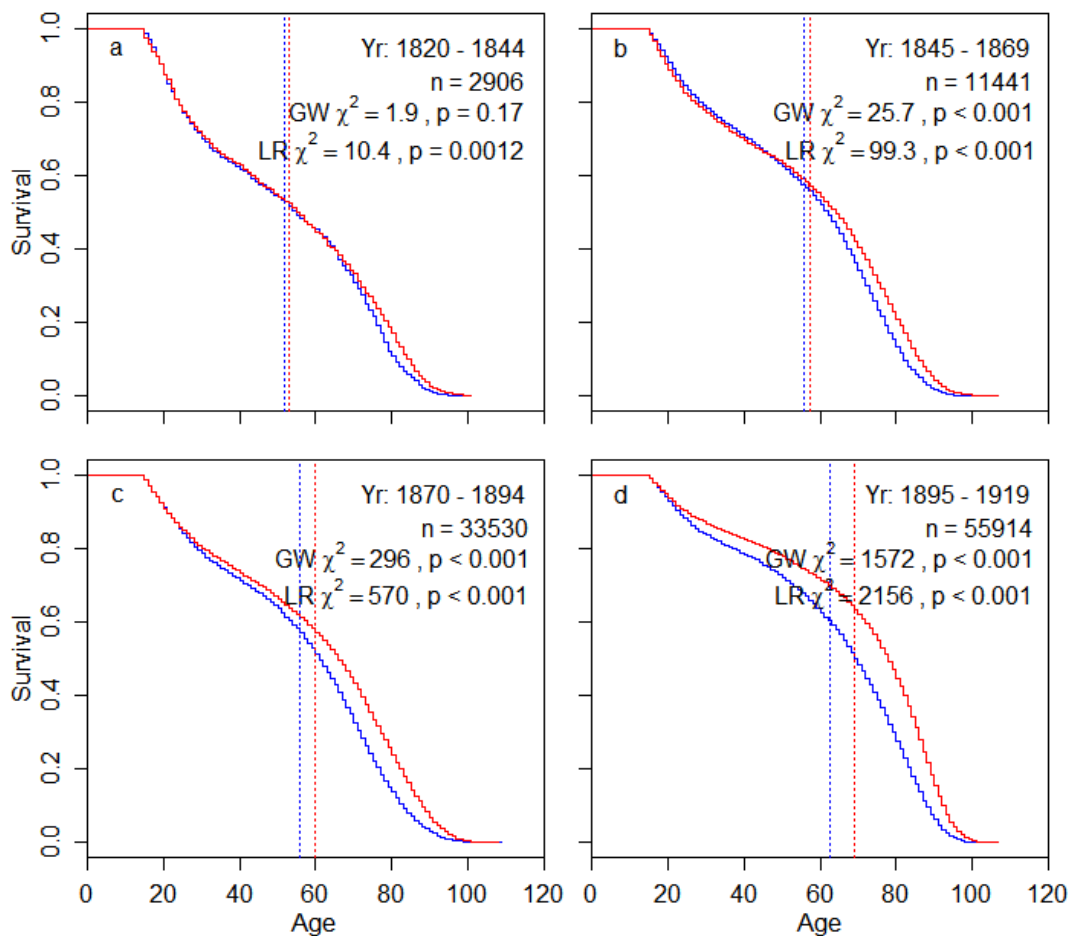

Supplement: srep24672-s1.pdf [file srep24672-s1.pdf]
